# Supplementary material for: A 2-fold interpenetrated zinc–organic framework with Lewis basic triazole sites: luminescence sensing of Fe3+ and Cr2O72−, and warm white-light emission by encapsulated Ln3+ ions
Source: Royal Society of Chemistry journal article supplement (doi:10.1039/d2ce00816e), 2022-01-01
Supplement: d2ce00816e1.pdf [file d2ce00816e1.pdf]

**A 2-fold interpenetrated zinc-organic framework with triazole sites: luminescent sensing of Fe<sup>3+</sup> and Cr<sub>2</sub>O<sub>7</sub><sup>2-</sup>, and warm white-light emission by Ln<sup>3+</sup> ions encapsulated**

*Bowen Qin,<sup>a, b</sup> Xiaoying Zhang,<sup>\*, a</sup> Jiangyan Dang,<sup>a</sup> Dan Yue,<sup>b</sup> Bing Zhang,<sup>b</sup> Weidong Li,<sup>b</sup> Godefroid Gahungu,<sup>c</sup> Zhenling Wang,<sup>\*, b</sup> and Jingping Zhang<sup>\*, a</sup>*

<sup>a</sup> Advanced Energy Materials Research Center, Faculty of Chemistry, Northeast Normal University, Changchun 130024, P. R. China

<sup>b</sup> College of Materials Engineering, Henan International Joint Laboratory of Rare Earth Composite Materials, Henan University of Engineering, Zhengzhou 451191, P. R. China

<sup>c</sup> Department of Chemistry, University of Burundi, BP 2700, Bujumbura, BURUNDI

**Table S1.** Crystallographic data for compound **1**.

| Compound                                    | Compound <b>1</b>                                                              |
|---------------------------------------------|--------------------------------------------------------------------------------|
| empirical formula                           | C <sub>49</sub> H <sub>55</sub> N <sub>9</sub> O <sub>17</sub> Zn <sub>2</sub> |
| formula weight                              | 1172.79                                                                        |
| <i>T</i> [K]                                | 293.15                                                                         |
| crystal system                              | Triclinic                                                                      |
| space group                                 | <i>P</i>                                                                       |
| <i>a</i> [Å]                                | 14.498                                                                         |
| <i>b</i> [Å]                                | 14.504                                                                         |
| <i>c</i> [Å]                                | 17.761                                                                         |
| $\alpha$ [°]                                | 84.51                                                                          |
| $\beta$ [°]                                 | 79.25                                                                          |
| $\gamma$ [°]                                | 61.42                                                                          |
| <i>V</i>                                    | 3222.0                                                                         |
| <i>Z</i>                                    | 2                                                                              |
| $\rho_{\text{calcd}}$ [g cm <sup>-3</sup> ] | 0.909                                                                          |
| $\mu$ [mm <sup>-1</sup> ]                   | 0.785                                                                          |
| <i>F</i> (000)                              | 896                                                                            |
| reflections collected                       | 60593                                                                          |
| independent reflections                     | 12270                                                                          |
| GOF                                         | 1.045                                                                          |
| $R_1$ , <sup>[a]</sup> $I > 2\sigma(I)$     | 0.0538                                                                         |
| $wR_2$ , <sup>[b]</sup> $I > 2\sigma(I)$    | 0.1681                                                                         |

**Table S2.** Selected bond distances (Å) and bond angles (°) for complex **1**.

|                   |            |                      |            |
|-------------------|------------|----------------------|------------|
| Zn(1)-O(1)        | 1.974(3)   | Zn(2)-O(5)#1         | 1.960(3)   |
| Zn(1)-O(2)        | 2.396(3)   | Zn(2)-O(7)           | 1.986(3)   |
| Zn(1)-O(4)#1      | 1.978(3)   | Zn(2)-O(9)#2         | 2.291(3)   |
| Zn(1)-O(6)        | 1.960(3)   | Zn(2)-O(10)#2        | 2.015(3)   |
| Zn(1)-N(1)        | 2.056(3)   | Zn(2)-N(6)#3         | 2.045(3)   |
| O(1)-Zn(1)-N(1)   | 108.03(12) | O(5)#1-Zn(2)-O(7)    | 101.36(12) |
| O(1)-Zn(1)-O(2)   | 58.52(13)  | O(5)#1-Zn(2)-O(10)#2 | 143.37(14) |
| O(1)-Zn(1)-O(4)#1 | 102.78(13) | O(5)#1-Zn(2)-N(6)#3  | 100.06(11) |
| O(4)#1-Zn(1)-N(1) | 96.65(13)  | O(5)#1-Zn(2)-O(9)#2  | 94.23(13)  |
| O(4)#1-Zn(1)-O(2) | 160.79(14) | O(7)-Zn(2)-O(9)#2    | 153.94(13) |
| O(6)-Zn(1)-O(1)   | 133.49(13) | O(7)-Zn(2)-O(10)#2   | 96.49(13)  |
| O(6)-Zn(1)-O(2)   | 86.67(12)  | O(7)-Zn(2)-N(6)#3    | 99.14(12)  |
| O(6)-Zn(1)-O(4)#1 | 106.25(13) | O(10)#2-Zn(2)-O(9)#2 | 59.63(13)  |
| O(6)-Zn(1)-N(1)   | 103.81(13) | O(10)#2-Zn(2)-N(6)#3 | 108.38(13) |
| N(1)-Zn(1)-O(2)   | 93.88(13)  | N(6)#3-Zn(2)-O(9)#2  | 98.53(13)  |

Symmetry transformations used to generate equivalent atoms: #1:  $x-1, y+1, z$ ; #2:  $x, y-1, z$ ; #3:  $x, y, z-1$ .

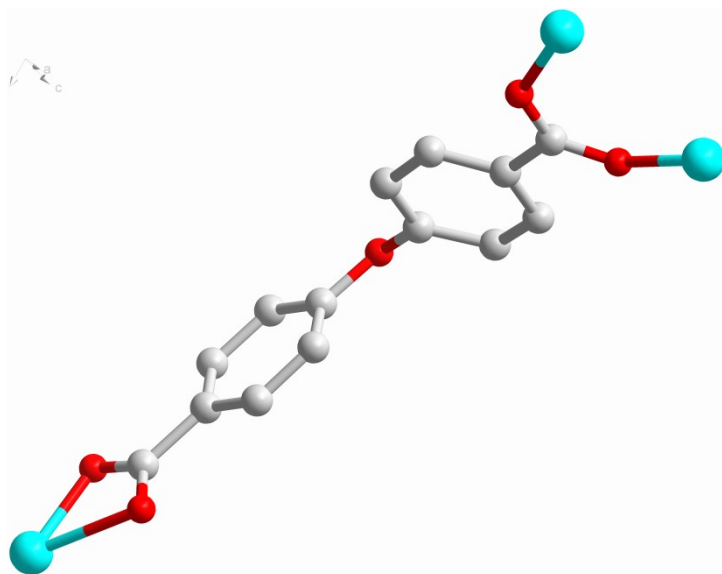

**Fig. S1** The coordination mode of H<sub>2</sub>OBA ligand.

**Table S3.** The comparison of Zn...Zn distance in paddle-wheel units with other reported works.

| Compound name | Atom...Atom | Corresponding distance (Å) | References                    |
|---------------|-------------|----------------------------|-------------------------------|
| HKUST-1       | Cu...Cu     | 2.628                      | Science, 1999, 283, 1148-1150 |

|                                                                                                  |         |       |                                             |
|--------------------------------------------------------------------------------------------------|---------|-------|---------------------------------------------|
| $[\{\text{Zn}_2(\text{abtc})(\text{dmf})_2\}_3] \cdot 4 \text{H}_2\text{O} \cdot 10\text{dmf}$   | Zn...Zn | 2.999 | Angew. Chem., Int. Ed., 2008, 47, 7741-7745 |
| MOF-508a                                                                                         | Zn...Zn | 2.961 | Angew. Chem. Int. Ed., 2006, 118, 1418-1421 |
| MOF-508b                                                                                         | Zn...Zn | 2.983 | Angew. Chem. Int. Ed., 2006, 118, 1418-1421 |
| $\{[\text{Zn}_2(\text{BPnDC})_2(\text{dabco})] \cdot 13\text{DMF} \cdot 3\text{H}_2\text{O}\}_n$ | Zn...Zn | 3.007 | Chem. Eur. J., 2008, 14, 8812-8821          |
| Zn-TCPP                                                                                          | Zn...Zn | 2.948 | Cryst. Growth Des., 2017, 17, 2090-2096     |
| $\text{Zn}_2(\mu\text{-OH})(\text{dia})_2(\text{sip}) \cdot 2\text{H}_2\text{O}$                 | Zn...Zn | 3.379 | CrystEngComm, 2022, 24, 5450-5459           |
| Compound 1                                                                                       | Zn...Zn | 3.458 | This work                                   |

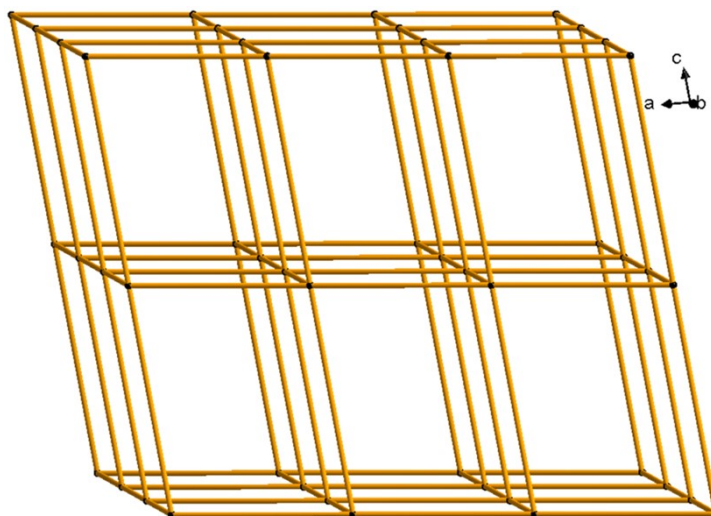

**Fig. S2** Schematic illustration of the topologic framework of compound 1.

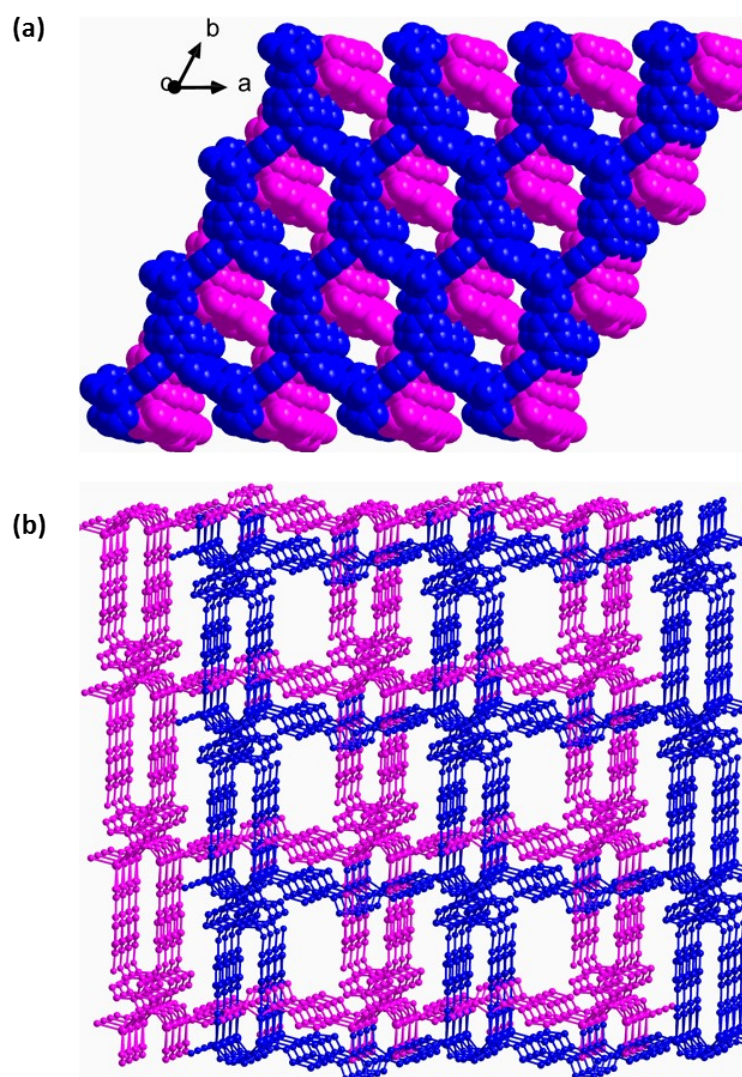

**Fig. S3** Crystal structure of compound **1** with the 2-fold interpenetrated framework.

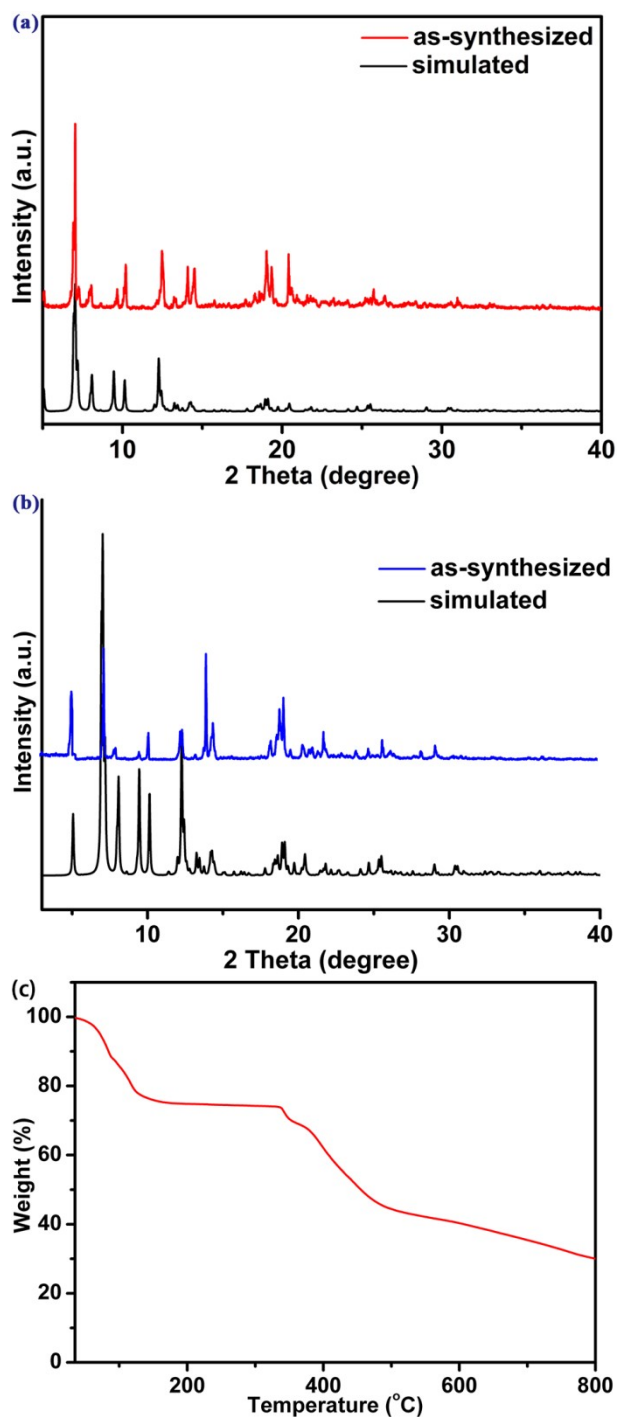

**Fig. S4** (a) The PXRD spectra of complex **1** as prepared and simulated with the test angle of 5-40 degree; (b) The PXRD spectra of compound **1** as prepared and simulated with the test angle of 2-40 degree; (c) TGA curve of compound **1**. Thermogravimetric analysis curve of compound **1** shows 24% weight loss, which can be assigned to loss of 3 DMA and 4 H<sub>2</sub>O molecules (cal. 24.84 %) from the crystal lattice.

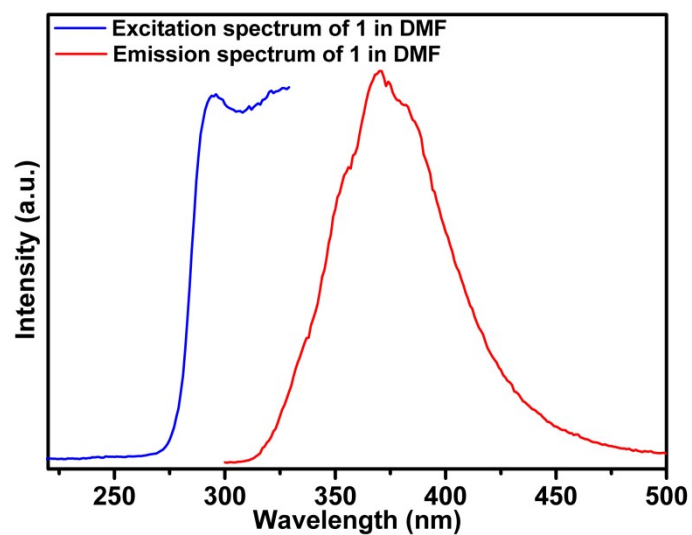

**Fig. S5** The excitation spectrum and emission spectrum (excited on 290 nm) of compound **1** in DMF.

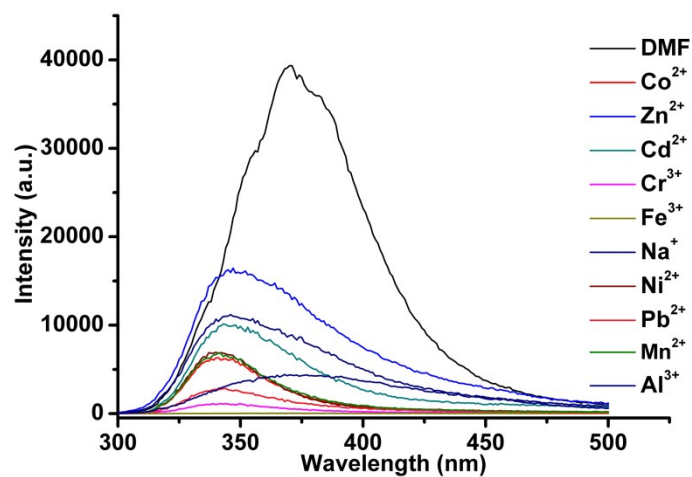

**Fig. S6** Luminescence spectra of compound **1** (excited on 290 nm) in DMF with various nitrate salts (1 mM).

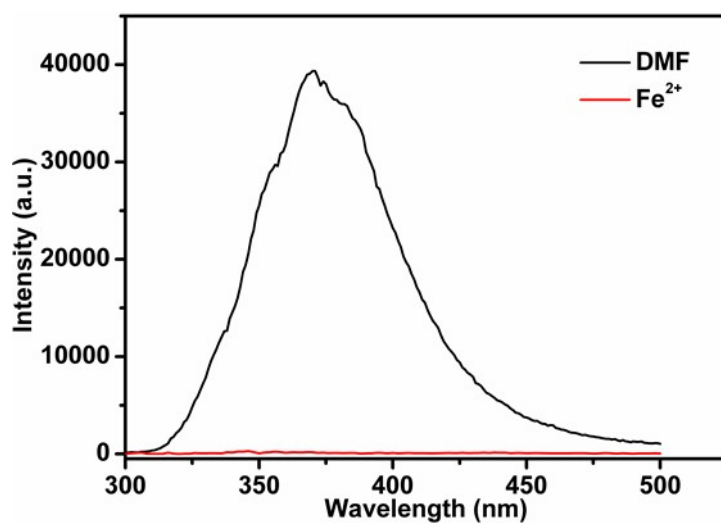

**Fig. S7** Luminescence spectra of compound **1** (excited on 290 nm) before and after addition of  $\text{Fe}^{2+}$ .

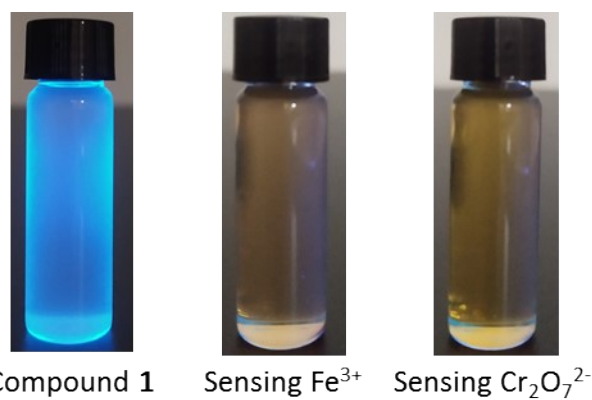

**Fig. S8** The photographs of compound **1** suspension treated with  $\text{Fe}^{3+}$  and  $\text{Cr}_2\text{O}_7^{2-}$  taken under UV light excitation.

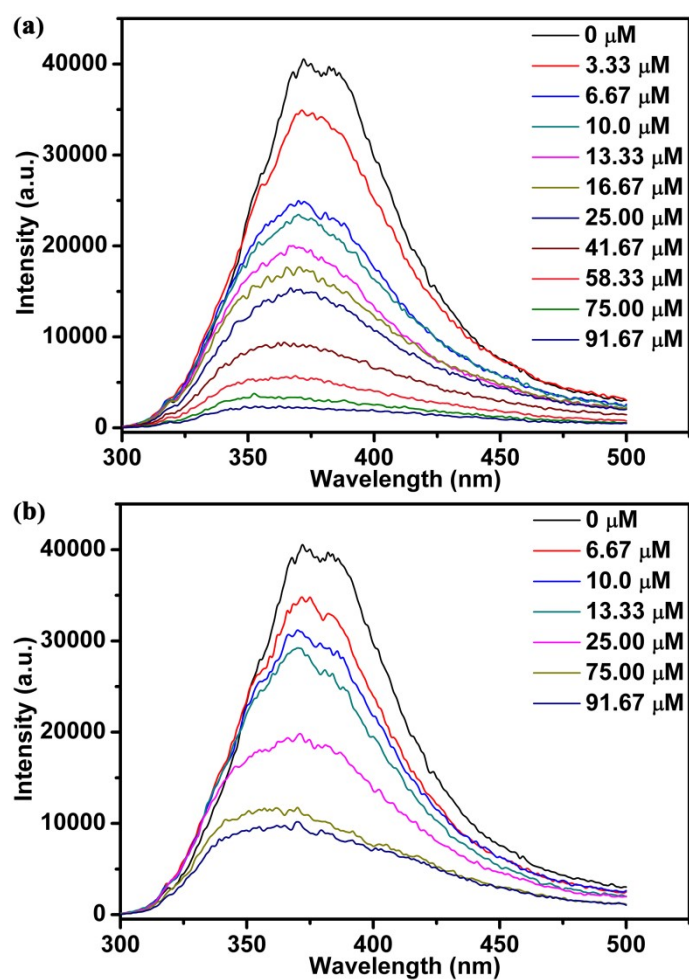

**Fig. S9** Luminescence spectra (excited on 290 nm) of compound **1** suspension after treated with varying amounts of  $\text{Fe}^{3+}$  (a) and  $\text{Cr}_2\text{O}_7^{2-}$  (b).



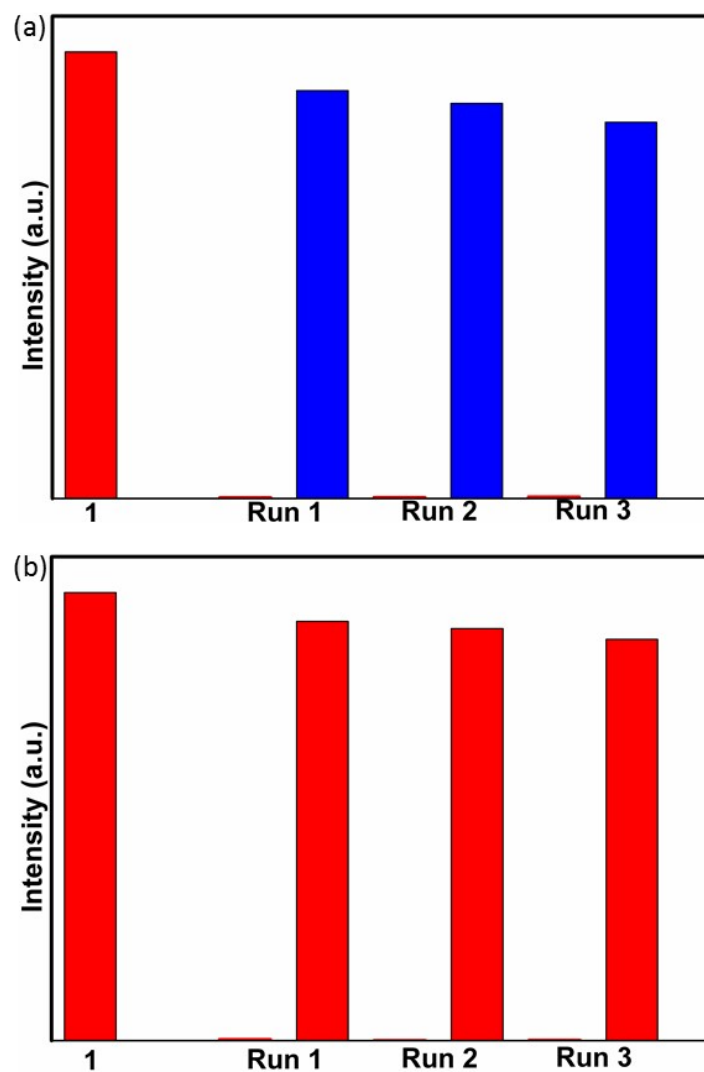

**Fig. S10** Multiple cycles for the luminescent quenching of compound **1** by  $\text{Fe}^{3+}$ (a) and  $\text{Cr}_2\text{O}_7^{2-}$ (b) and recovery after washing by DMF for several times.

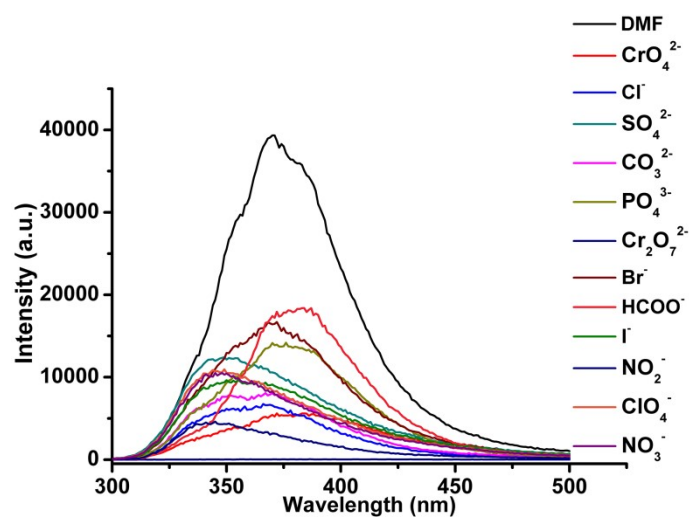

**Fig. S11** Luminescence spectra (excited on 290 nm) of compound **1** suspension after treated with different anions.

**Table S4.** Comparison of  $K_{sv}$  and limits of detection among other reported materials and compound **1** as the  $Fe^{3+}$  sensor.

| Compound name                                              | $K_{sv}, M^{-1}$    | Detection limit, $\mu M$ | References                              |
|------------------------------------------------------------|---------------------|--------------------------|-----------------------------------------|
| SLX-1                                                      |                     | 6.45                     | DaltonTrans., 2022, 51, 2890-2897       |
| $\{[(CH_3)_2NH_2]_4[Ca_2Zn_4(L)_4] \cdot 4 DMF\}_n$        | $4.36 \times 10^3$  | 18.8                     | CrystEngComm, 2020, 22, 4710-4715       |
| Zn-MOF                                                     | $3.93 \times 10^4$  | 0.90                     | Inorg. Chem., 2020, 59, 4588-4600       |
| $[Zn(TIBTC)(DMA)] \cdot [NH_2(CH_3)_2]$                    | $9.71 \times 10^4$  | 3.45                     | Inorg. Chem., 2020, 59, 8081-8098       |
| $[Cd(TIBTC)(H_2O)] \cdot [NH_2(CH_3)_2] \cdot DMA$         | $2.43 \times 10^4$  | 5.51                     |                                         |
| $[Zn_3(dpcp)_2(1,4'-bmib)_2]_n$                            | 40632               | 1.43                     | Cryst. Growth Des., 2021, 21, 5558-5572 |
| $\{[Zn_4(dpcp)_2(4,4'-bibp)_2(\mu_2-O)_4] \cdot 3H_2O\}_n$ | 143855              | 0.21                     |                                         |
| $[Zn(2-ata)(bidpe)]_n$                                     | 52732               | 0.57                     |                                         |
| $[Zn(bbibp)(HCOO)_2]_n$                                    | 24713               | 1.36                     |                                         |
| $[Bi(BTC)(H_2O)] \cdot H_2O$                               | $2.02 \times 10^4$  | 1.59                     | Cryst. Growth Des., 2019, 19, 7217-7229 |
| Eu-MOF                                                     | $2.23 \times 10^4$  | 1.12                     | CrystEngComm, 2022, 24, 1358-1367       |
| $[Co_2(4-dptb)_2(1,3-BDC)_2] \cdot 2H_2O$                  |                     | 5.84                     | Cryst. Growth Des., 2021, 21, 4390-4397 |
| $[Zn(OBA)_2(L_1) \cdot 2DMA]_n$                            | $4.22 \times 10^4$  | 1.06                     | Inorg. Chem., 2021, 60, 1716-1725       |
| <b>Compound 1</b>                                          | $7.69 \times 10^4$  | 0.58                     | This work                               |
| <b>Eu<sup>3+</sup>/Tb<sup>3+</sup>@compound 1 (3:2)</b>    | $4.606 \times 10^4$ | 0.98                     | This work                               |

**Table S5.** Comparison of  $K_{sv}$  and limits of detection among other reported materials and compound **1** as the  $Cr_2O_7^{2-}$  sensor.

| Compound name                             | $K_{sv}, M^{-1}$   | Detection limit, $\mu M$ | References                              |
|-------------------------------------------|--------------------|--------------------------|-----------------------------------------|
| $[Zn_2(tpeb)(bpdc)_2]$                    | $1.08 \times 10^4$ | 1.07                     | Inorg. Chem., 2020, 59, 8818-8826       |
| $[Zn_3(dpcp)_2(1,4'-bmib)_2]_n$           | $5.32 \times 10^4$ | 0.71                     | Cryst. Growth Des., 2021, 21, 5558-5572 |
| Eu-MOF                                    | $1.29 \times 10^4$ | 1.95                     | CrystEngComm, 2022, 24, 1358-1367       |
| $[Co_2(4-dptb)_2(1,3-BDC)_2] \cdot 2H_2O$ |                    | 6.51                     | Cryst. Growth Des., 2021, 21, 4390-4397 |

|                                                                                                                               |                    |      |                                         |
|-------------------------------------------------------------------------------------------------------------------------------|--------------------|------|-----------------------------------------|
| CSMCRI-5                                                                                                                      | $1.73 \times 10^4$ | none | Inorg. Chem., 2020, 59, 3012-3025       |
| $[\text{Bi}(\text{BTC})(\text{H}_2\text{O})] \cdot \text{H}_2\text{O}$                                                        | $1.95 \times 10^4$ | 1.64 | Cryst. Growth Des., 2019, 19, 7217-7229 |
| $\{[\text{H}_2\text{N}(\text{Me})_2]_2[\text{Zn}_5(\text{L})_2(\text{OH})_2] \cdot 3\text{DMF} \cdot 4\text{H}_2\text{O}\}_n$ | $1.45 \times 10^4$ | 186  | New J. Chem., 2022, 46, 4292-4299       |
| $\{[\text{Cd}(\text{L})(\text{H}_2\text{O})_2] \cdot 4\text{H}_2\text{O}\}_n$                                                 | $3.58 \times 10^4$ | 8.2  | CrystEngComm, 2019, 21, 5185-5194       |
| $[\text{Zn}(\text{OBA})_2(\text{L}_1) \cdot 2\text{DMA}]_n$                                                                   | $1.2 \times 10^4$  | 3.87 | Inorg. Chem., 2021, 60, 1716-1725       |
| <b>Compound 1</b>                                                                                                             | $3.28 \times 10^4$ | 1.37 | This work                               |
| $\text{Eu}^{3+}/\text{Tb}^{3+}@\text{compound 1 (3:2)}$                                                                       | $2.16 \times 10^4$ | 2.08 | This work                               |

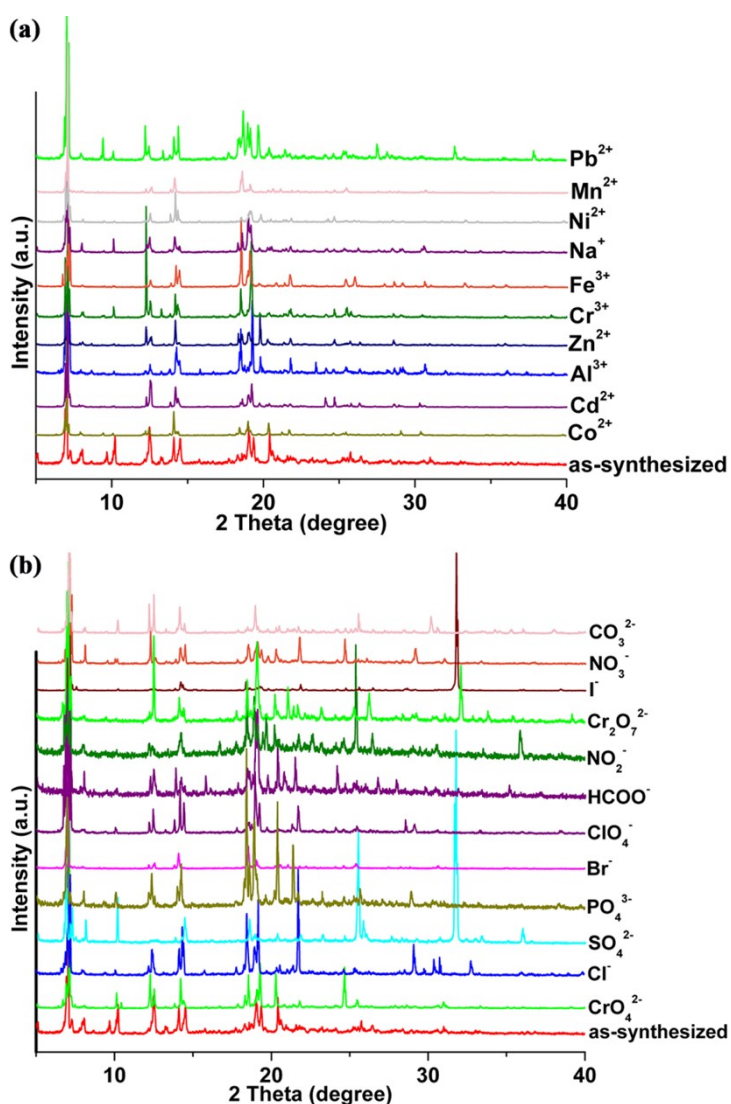

**Fig. S12** The PXRD patterns of compound **1** after immersed in DMF solution containing cations (a) and anions (b) with concentration of 1 mM. Some ions enter the skeletons, making the diffraction peaks of this compound change partially.

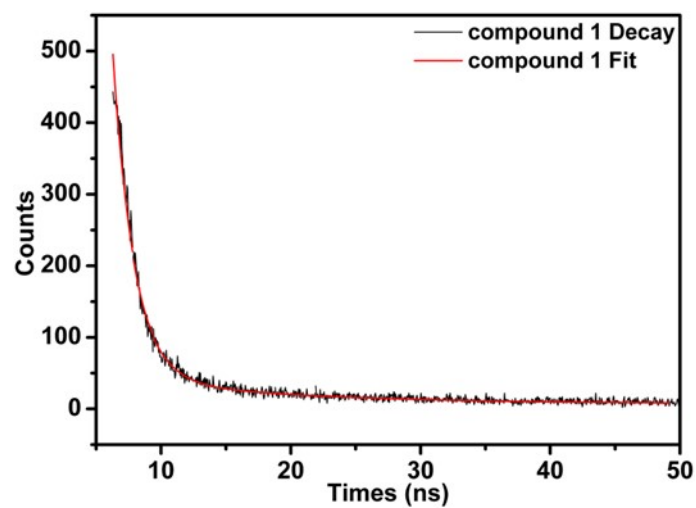

Fig. S13 The lifetime curves of compound 1.

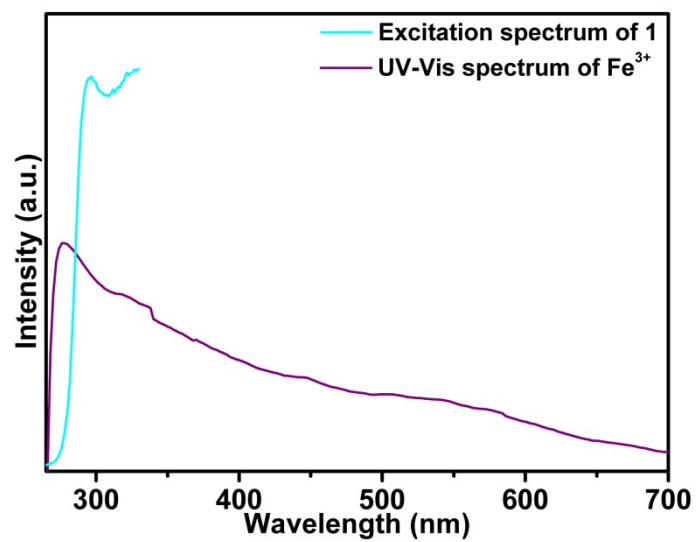

Fig. S14 The excitation spectrum of compound 1 and the UV-Vis adsorption spectra of Fe<sup>3+</sup> in DMF.

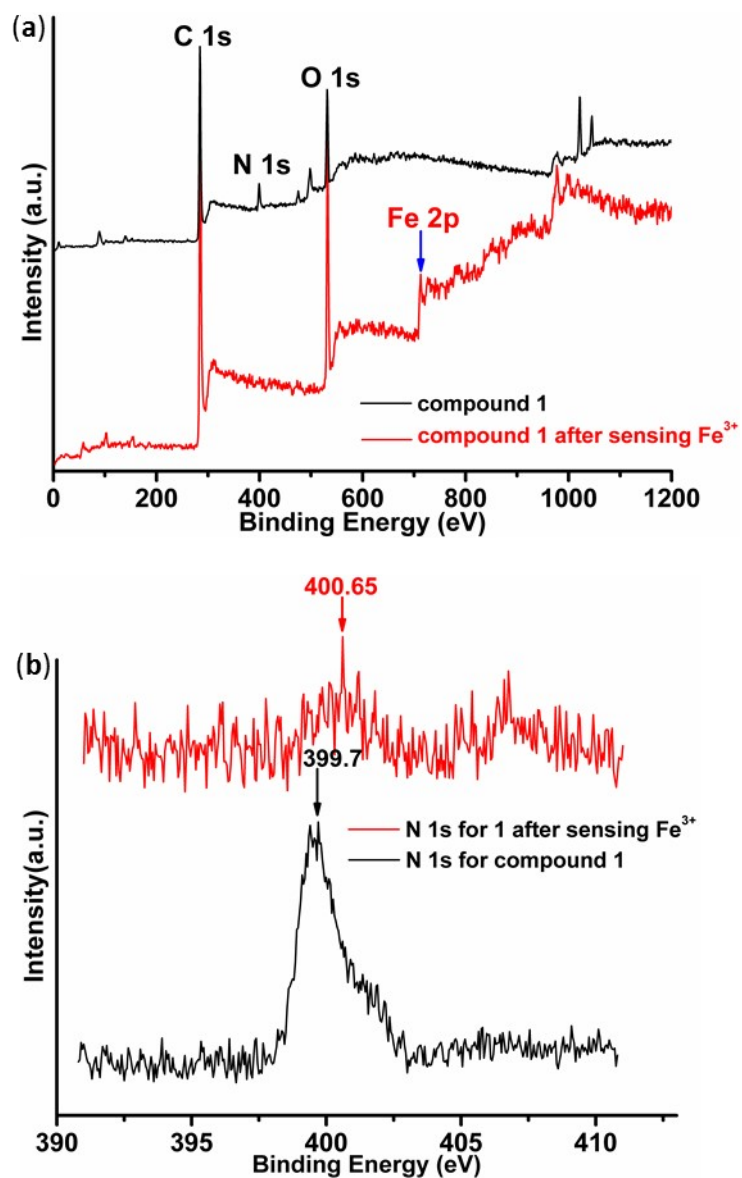

**Fig. S15** (a) High-resolution XPS spectra of compound **1** before and after sensing Fe<sup>3+</sup>; (b) High-resolution XPS spectra for the N 1s region of compound **1** before and after sensing Fe<sup>3+</sup>.

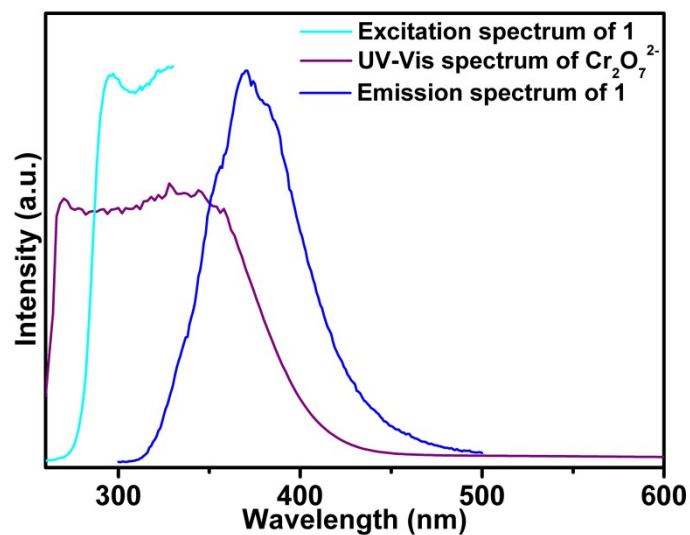

**Fig. S16** The excitation and emission spectra of compound **1** and the UV-Vis adsorption spectra of  $\text{Cr}_2\text{O}_7^{2-}$  in DMF.

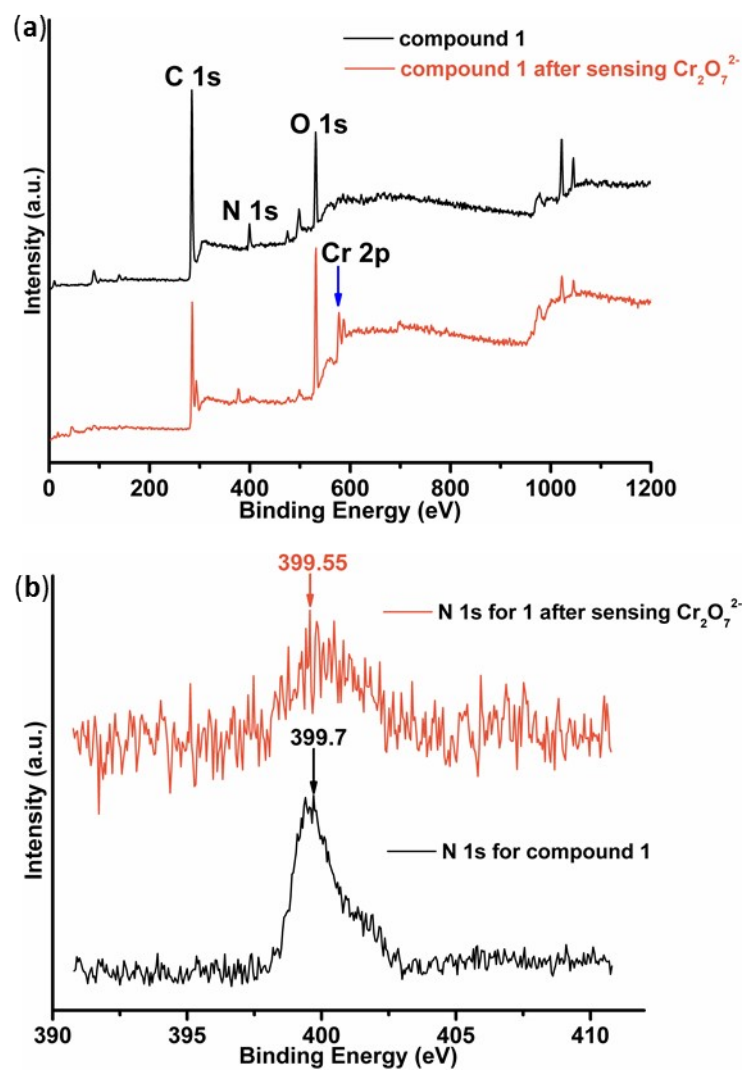

**Fig. S17** (a) High-resolution XPS spectra of compound **1** before and after sensing  $\text{Cr}_2\text{O}_7^{2-}$ ; (b) High-resolution XPS spectra for the N 1s region of compound **1** before

and after sensing  $\text{Cr}_2\text{O}_7^{2-}$ .

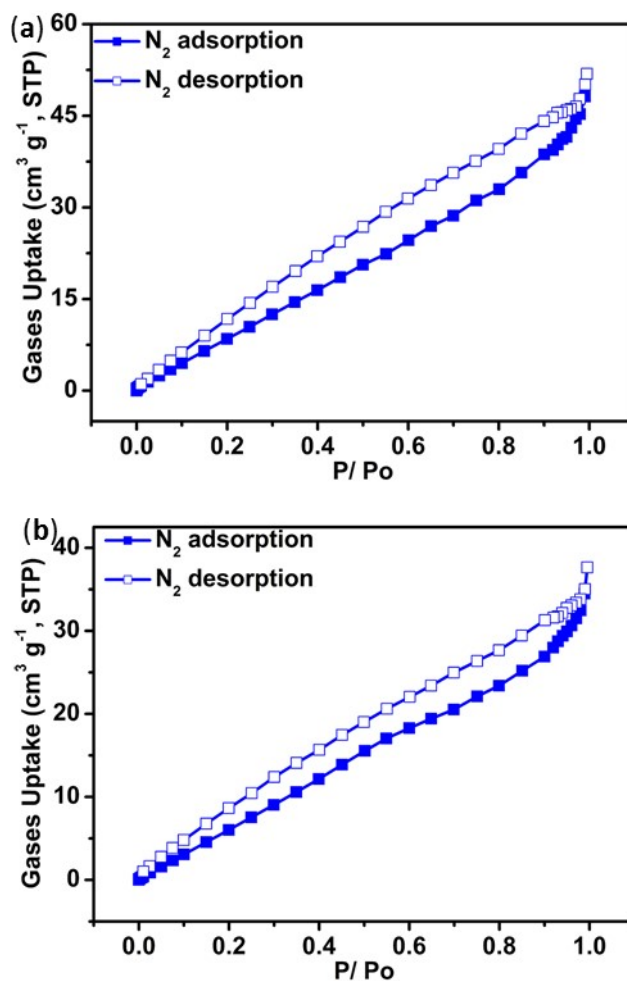

**Fig. S18** The  $\text{N}_2$  adsorption/desorption curve of compound **1** at 77 K with different exchange solvents (a: dichloromethane; b: methanol). The outgas temperature is  $120^\circ\text{C}$ . The gas desorption data with obvious hysteresis confirm a breathing behavior for compound **1**, suggesting the flexibility between the skeletons.

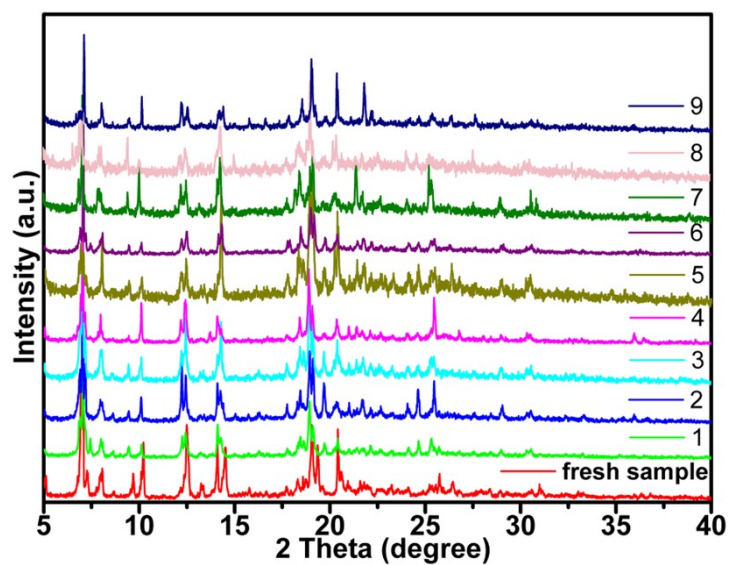

Fig. S19 The PXRD patterns of  $\text{Ln}^{3+}$ @compound 1.

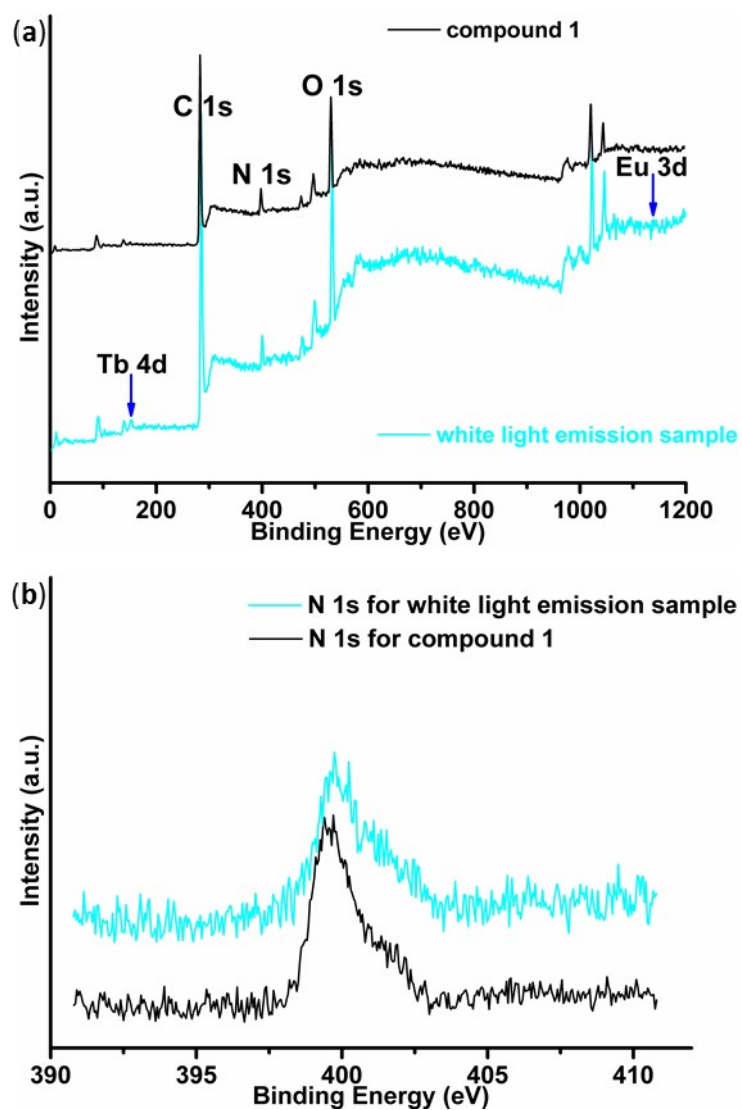

Fig. S20 (a) High-resolution XPS spectra of compound 1 before and after



encapsulating  $\text{Ln}^{3+}$ ; (b) High-resolution XPS spectra for the N 1s region of compound **1** before and after encapsulating  $\text{Ln}^{3+}$ .

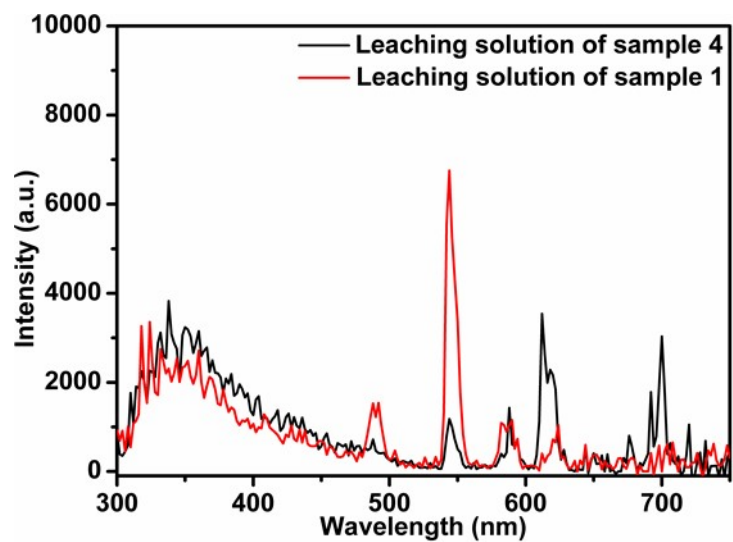

**Fig. S21** The leaching tests of samples 1 and 4 performed in DMF.

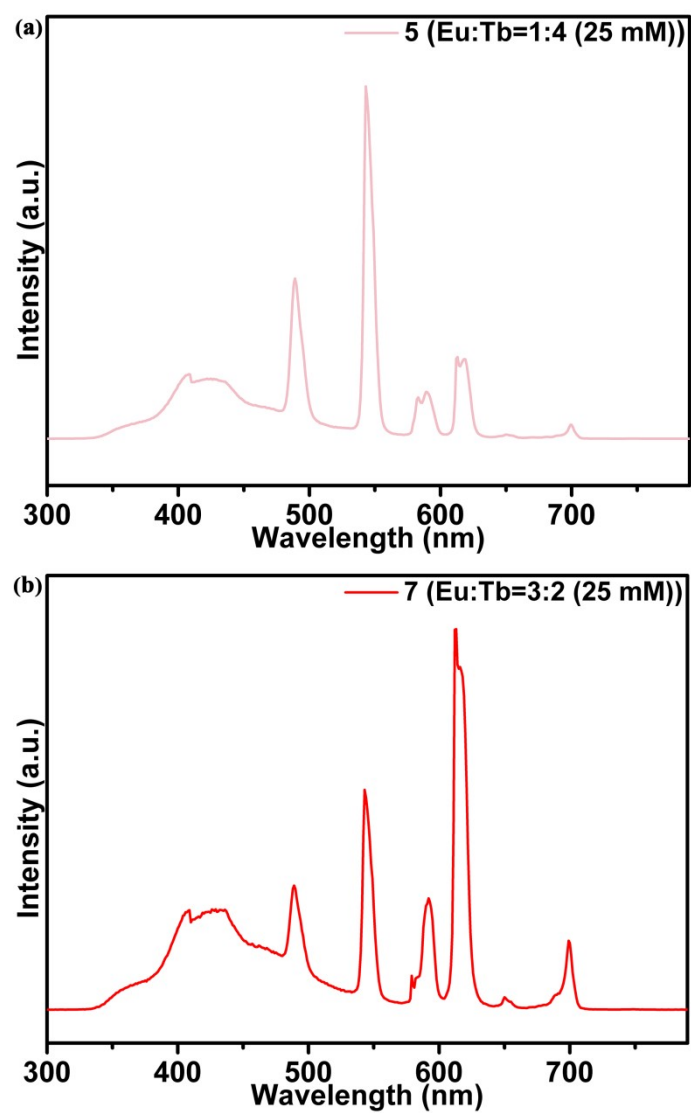

**Fig. S22** The emission spectra of Eu/Tb-doped compound 1 (excited on 290 nm). The samples 5 and 7 were prepared by soaking 40 mg MOF in 10 mL DMF solutions containing 25 mM  $\text{Ln}^{3+}$  with different molar ratio.

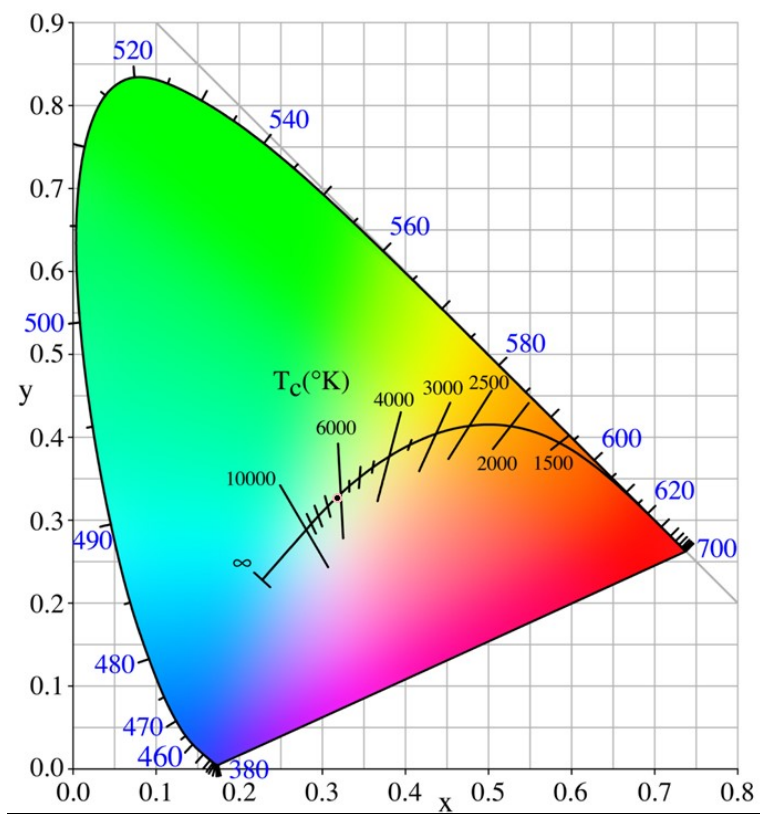

**Fig. S23** The CIE chromaticity diagram of  $\text{Eu}^{3+}/\text{Tb}^{3+}$ @compound **1** with white-light emission.

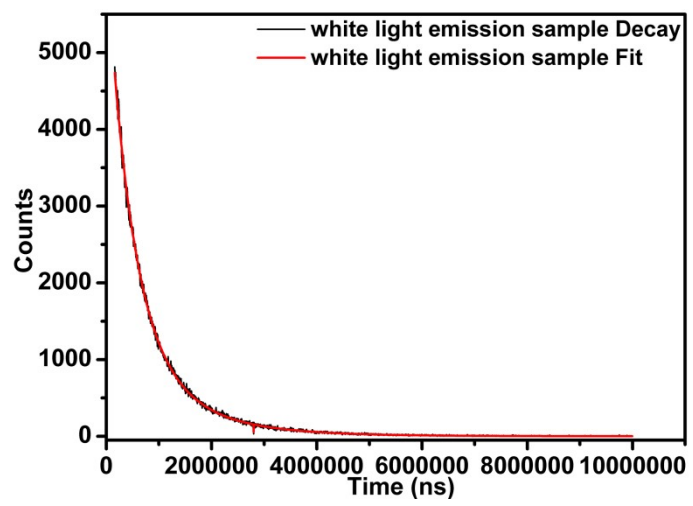

**Fig. S24** The lifetime curves of white light emission sample.

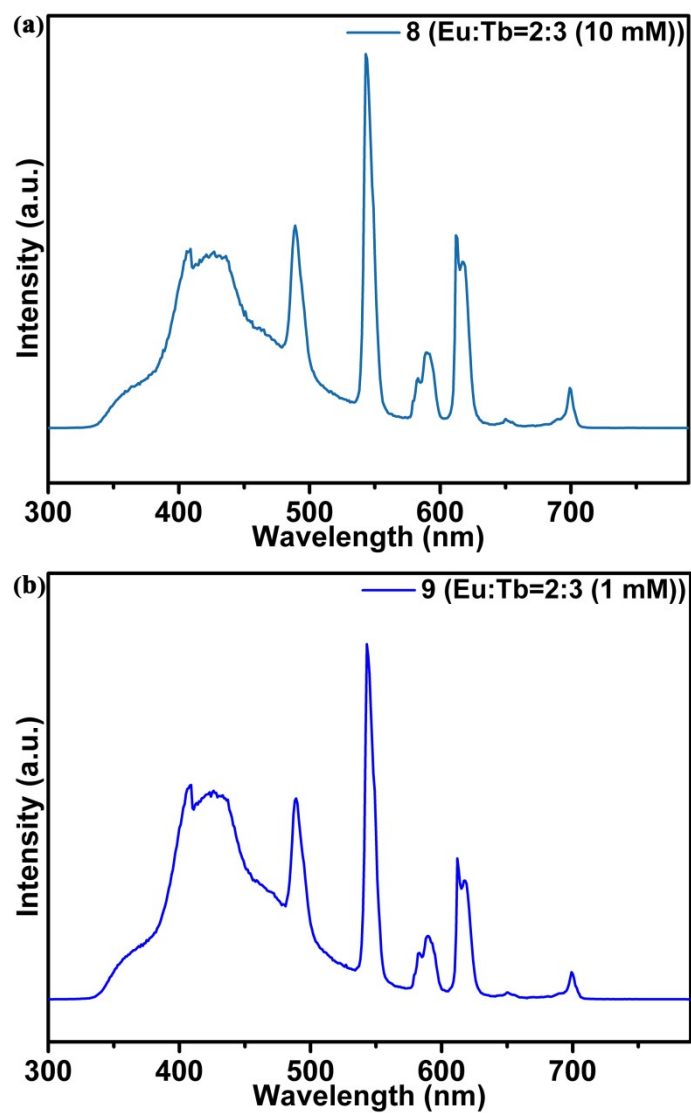

**Fig. S25** The emission spectra of samples 8 and 9 prepared by soaking 40 mg compound **1** in 10 mL DMF solutions containing 10 mM (a) and 1 mM (b) Ln<sup>3+</sup> with molar ration 2/3 (Eu/Tb) (excited on 290 nm).

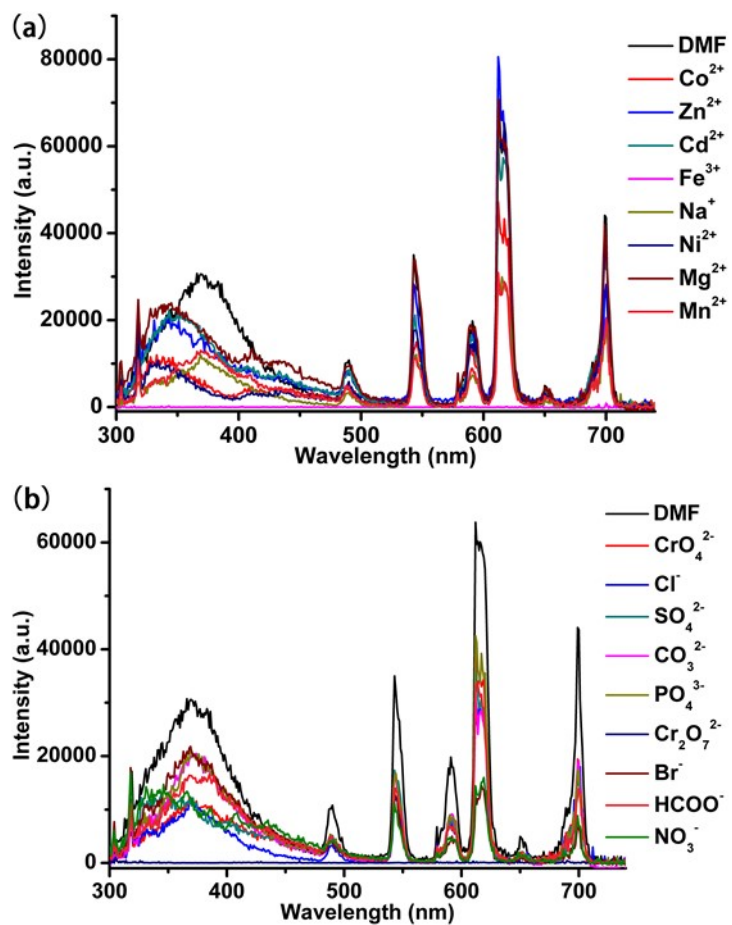

**Fig. S26** Luminescent spectra of  $\text{Eu}^{3+}/\text{Tb}^{3+}$ @compound **1** (excited on 290 nm) in DMF with various cations (a) and anions (b) (1 mM), respectively.

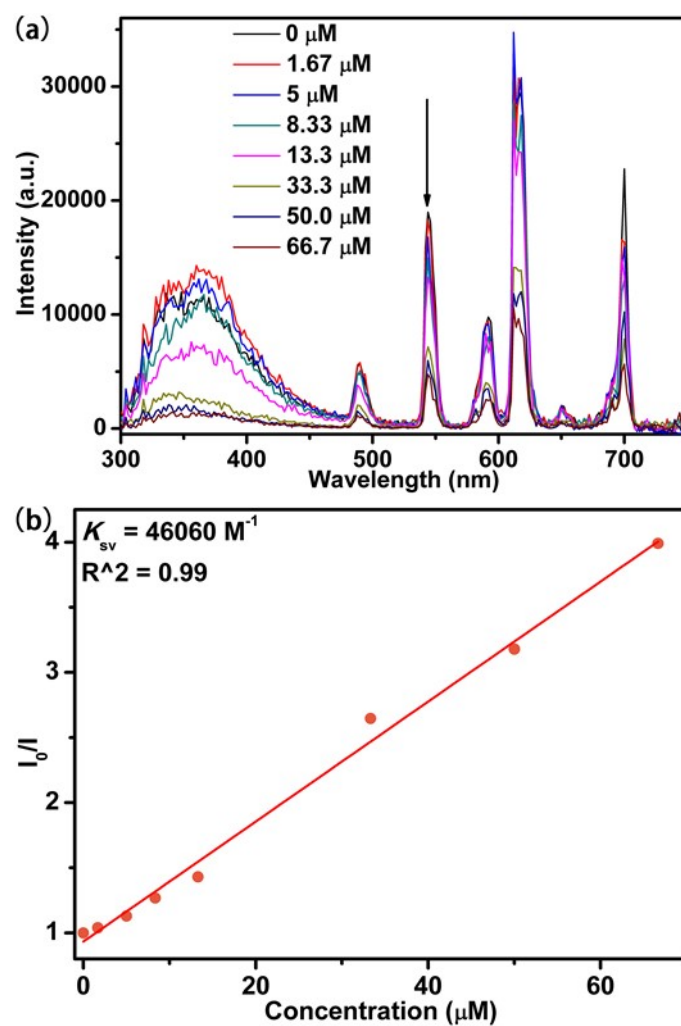

**Fig. 27** The luminescent spectra (a) and Stern-Volmer plots (b) for sensing  $\text{Fe}^{3+}$  with different concentrations  $\text{Cr}_2\text{O}_7^{2-}$  by compound **1**.

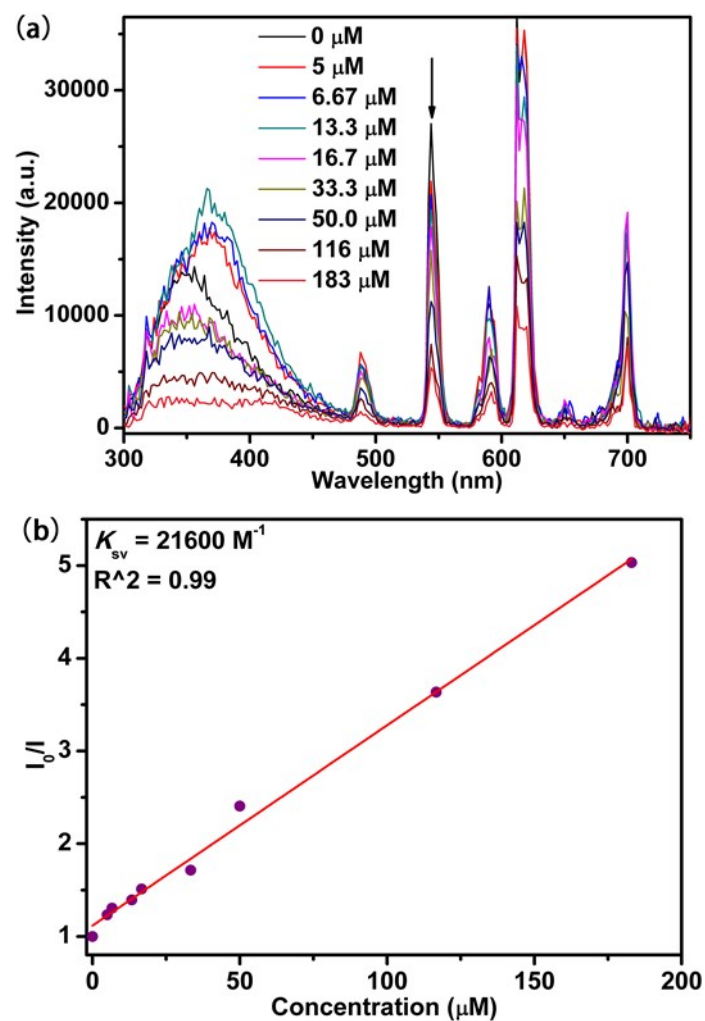

**Fig. 28** The luminescent spectra (a) and Stern-Volmer plots (b) for sensing  $\text{Cr}_2\text{O}_7^{2-}$  with different concentrations by compound **1**.
